# Supplementary material for: Genetic Architecture of Vitamin B12 and Folate Levels Uncovered Applying Deeply Sequenced Large Datasets
Source: PLOS journal article supplement (doi:10.1371/journal.pgen.1003530), 2013-06-06
Supplement: S13 (10.1371/journal.pgen.1003530.s013) [file journal.pgen.1003530.s013]

| <b>Table S11.</b> Association results for the B <sub>12</sub> and folate variants with diseases and traits in deCODE database |                      |                         |                                           |       |        |      |                        |
|-------------------------------------------------------------------------------------------------------------------------------|----------------------|-------------------------|-------------------------------------------|-------|--------|------|------------------------|
| Condition                                                                                                                     | N cases/<br>controls | Annotation <sup>1</sup> | Allele <sup>2</sup><br>(effect/<br>other) | EAF   | Effect | OR   | P                      |
| <b><i>FUT2 (rs60266) - multiplicative model</i></b>                                                                           |                      |                         |                                           |       |        |      |                        |
| B <sub>12</sub>                                                                                                               | 37,283               | G258S                   | A/ <b>G</b>                               | 0.596 | 0.16   |      | $4.1 \times 10^{-96}$  |
| Cancer antigen 19 9                                                                                                           | 4,493                | G258S                   | A/ <b>G</b>                               | 0.596 | 0.48   |      | $1.1 \times 10^{-146}$ |
| Liver alkaline phosphatase                                                                                                    | 49,840               | G258S                   | A/ <b>G</b>                               | 0.596 | -0.08  |      | $1.1 \times 10^{-73}$  |
| Lipase                                                                                                                        | 14,929               | G258S                   | A/ <b>G</b>                               | 0.596 | 0.10   |      | $2.2 \times 10^{-24}$  |
| Psoriasis                                                                                                                     | 1,657/92,792         | G258S                   | A/ <b>G</b>                               | 0.596 |        | 1.14 | 0.0043                 |
| Low BMD <sup>3</sup>                                                                                                          |                      | G258S                   | A/ <b>G</b>                               |       |        |      |                        |
| Hip, spine or whole body                                                                                                      | 4,931/69,034         | G258S                   | A/ <b>G</b>                               | 0.596 |        | 1.10 | $4.6 \times 10^{-4}$   |
| Spine                                                                                                                         | 3,015/41,800         | G258S                   | A/ <b>G</b>                               | 0.596 |        | 1.16 | $1.3 \times 10^{-5}$   |
| <b><i>FUT6 (7788053) - recessive model</i></b>                                                                                |                      |                         |                                           |       |        |      |                        |
| B <sub>12</sub>                                                                                                               | 37,283               | P124S                   | A/ <b>G</b>                               | 0.254 | 0.046  |      | $2.1 \times 10^{-7}$   |
| AAA                                                                                                                           | 1,163/61,639         | P124S                   | A/ <b>G</b>                               | 0.254 |        | 0.65 | 0.037                  |
| AAA <65 years                                                                                                                 | 209/41,800           | P124S                   | A/ <b>G</b>                               | 0.254 |        | 0.21 | 0.010                  |
| <b><i>MTHFR (rs18011339) - recessive model</i></b>                                                                            |                      |                         |                                           |       |        |      |                        |
| Folate                                                                                                                        | 28,913               | A222V                   | <b>G</b> /A                               | 0.668 | 0.096  |      | $1.0 \times 10^{-28}$  |
| TA                                                                                                                            | 219/31,536           | A222V                   | <b>G</b> /A                               | 0.668 |        | 0.48 | 0.0056                 |

Shown are the strongest association results for the folate and B<sub>12</sub> variants, genome-wide significant or suggestive, with diseases and traits in deCODE's database.

EAF, effect allele frequency; BMD, bone mineral density; AAA, abdominal aortic aneurysm; TA, thoracic aneurysm;

<sup>1</sup>The annotation is based on the RefSeq hg18

<sup>2</sup>The reference alleles based on Build 36 hg18 are shown in bold

<sup>3</sup>The low BMD phenotypes are defined as those BMD values that are below -1 standard deviation (SD) from the mean.
